# Supplementary material for: Genetic manipulation of the human gut bacterium Eggerthella lenta reveals a widespread family of transcriptional regulators
Source: PubMed Central journal article supplement (PMC9734109; doi:10.1038/s41467-022-33576-3), 2022-12-09
Supplement: 41467_2022_33576_MOESM1_ESM.pdf [file 41467_2022_33576_MOESM1_ESM.pdf]

## Supplementary Information

### **Genetic manipulation of the human gut bacterium *Eggerthella lenta* reveals a widespread family of transcriptional regulators**

Authors: Xueyang Dong<sup>1</sup>, Ben G. H. Guthrie<sup>2</sup>, Margaret Alexander<sup>2</sup>, Cecilia Noecker<sup>2</sup>, Lorenzo Ramirez<sup>2</sup>, Nathaniel R. Glasser<sup>1</sup>, Peter J. Turnbaugh<sup>2,3</sup>, Emily P. Balskus<sup>1,4\*</sup>

<sup>1</sup>Department of Chemistry and Chemical Biology, Harvard University, Cambridge, MA 02138, USA

<sup>2</sup>Department of Microbiology & Immunology, University of California San Francisco, San Francisco, CA 94143, USA

<sup>3</sup>Chan Zuckerberg Biohub, San Francisco, CA 94158, USA

<sup>4</sup>Howard Hughes Medical Institute, Harvard University, Cambridge, MA 02138, USA

\*Correspondence: [balskus@chemistry.harvard.edu](mailto:balskus@chemistry.harvard.edu)

This file includes:

Supplementary Figures 1–8

Supplementary Tables 1

**a**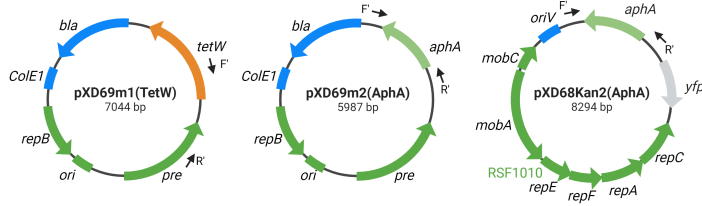**b**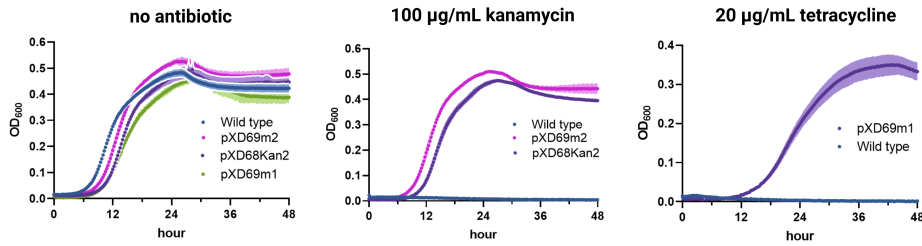**c**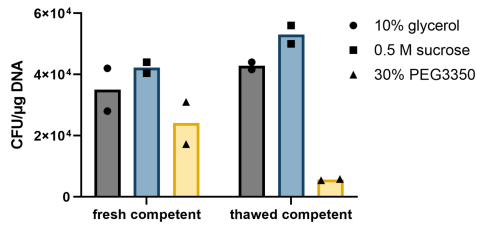**d**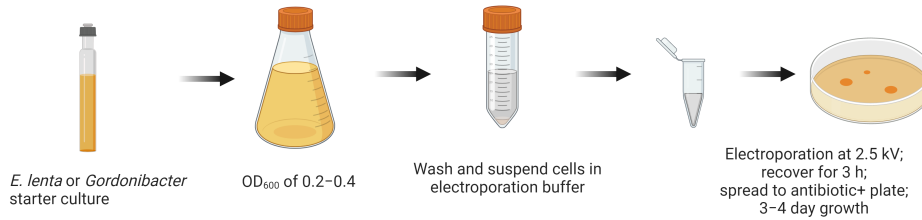**e**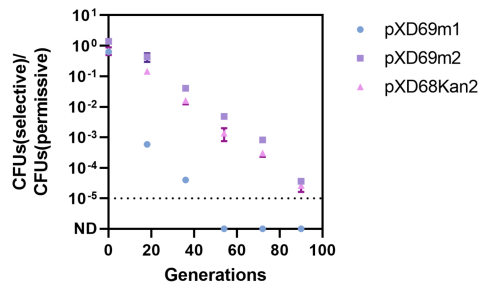**g**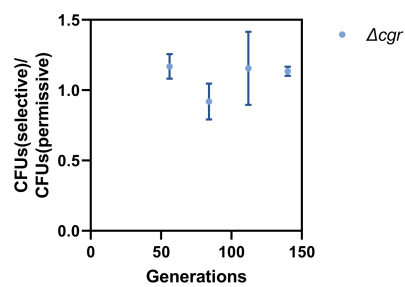**f**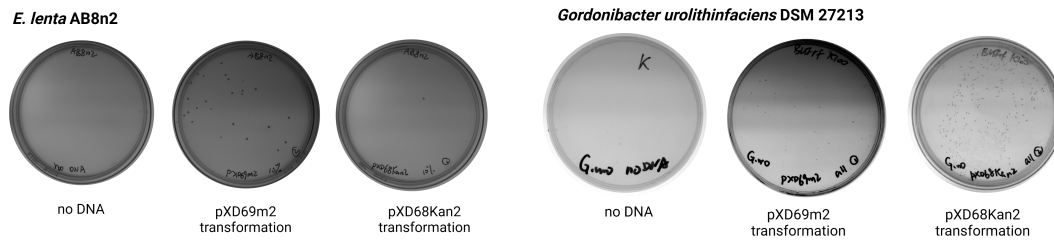



**Supplementary Fig. 1| Transformation of human gut Coriobacteria related to Fig. 1.** **a**, Arrows indicating regions amplified on individual plasmid to confirm plasmid presence within *E. lenta* and *Gordonibacter* transformants. **b**, Growth of *E. lenta* DSM 2243 pXD69m1, pXD69m2, and pXD68Kan2 transformants and WT strain in liquid BHIrf medium or medium supplemented with 100 µg/mL kanamycin or 20 µg/mL tetracycline. **c**, Additional buffers, 0.5 M sucrose solution or 30% PEG3350 solution, could be used to prepare *E. lenta* DSM 2243 electrocompetent cells. Electrocompetent *E. lenta* cells made with 10% glycerol or 0.5 M sucrose tolerated freezing. We thus used 10% glycerol to prepare *E. lenta* DSM 2243 electrocompetent cells and stored competent cells at –80 °C for further routine transformation unless otherwise noted. **d**, Workflow of preparing *E. lenta* and *Gordonibacter* species electrocompetent cells. **e**, Plasmid maintenance of pXD69m1, pXD69m2 and pXD68Kan2 in *E. lenta* DSM 2243. ND: colonies not detected in the selective medium. **f**, Transformation of additional *E. lenta* and *Gordonibacter* species strains. Electrocompetent cells for *E. lenta* 28B, A2, AB8n2, AB12n2, CC8/2 BHI2 and Valencia strains, *Gordonibacter pamelaee* 3C, *Gordonibacter sp.* 28C and *Gordonibacter urolithinifaciens* DSM 27213 were prepared following the same procedures for *E. lenta* DSM 2243. We found plasmids can be transformed into *E. lenta* AB8n2, *Gordonibacter urolithinifaciens* DSM 27213 and *Gordonibacter sp.* 28C, but not others, using our electroporation conditions. **g**, Plasmid maintenance of *cgr*-editing plasmid in *E. lenta* DSM 2243  $\Delta cgr$ . Results represented as mean with n = 2 biological replicates for **c**. Results represented as mean  $\pm$  standard deviation (SD) with n = 3 biological replicates for **b**, **e** and **g**. Source data are provided as a Source Data file.

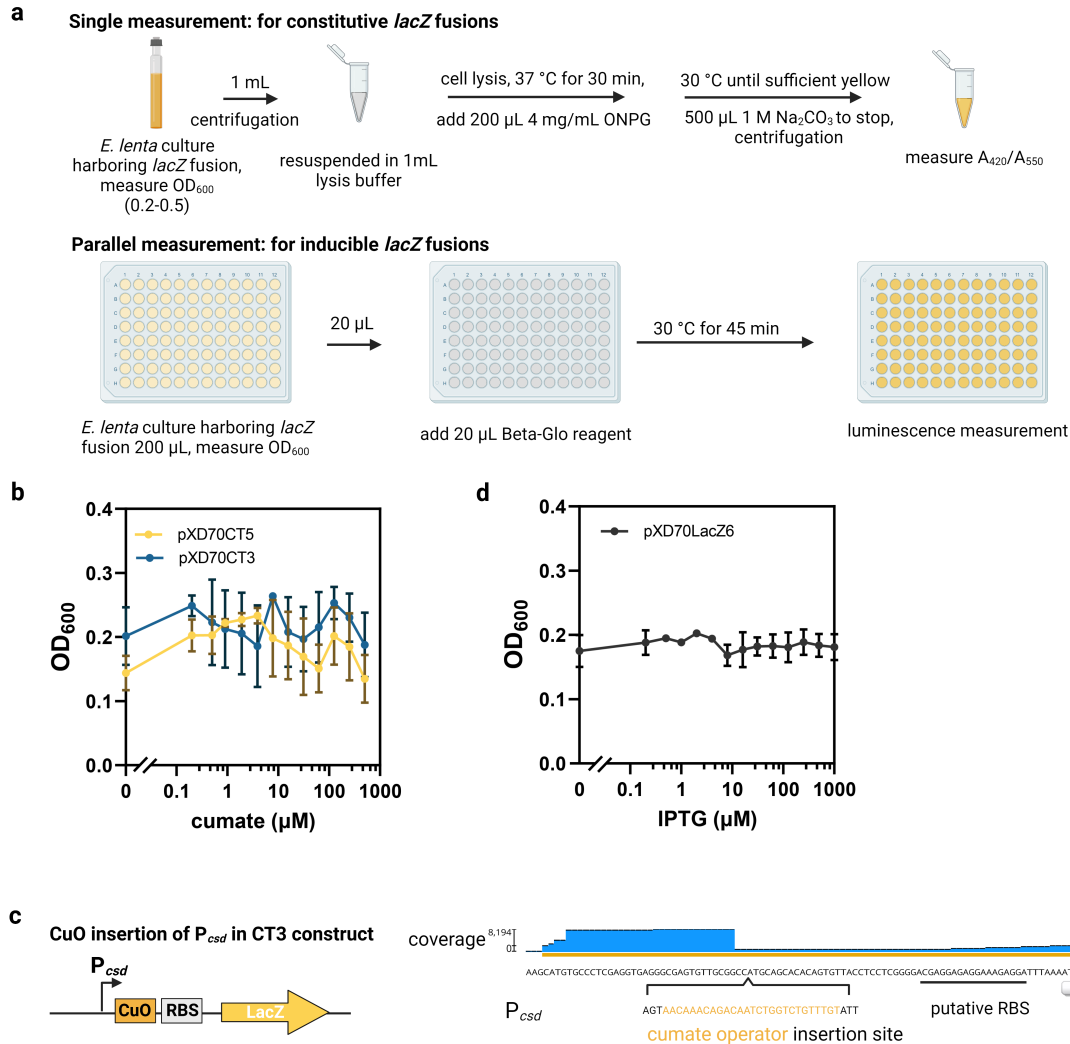

**Supplementary Fig. 2] Construction and characterization of inducible expression systems using *lacZ* reporter related to Fig. 2. a**, Workflow of *lacZ* assays to measure  $\beta$ -Gal activity of *E. lenta* cultures harboring different *lacZ* fusions. **b**, Growth of *E. lenta* DSM 2243 cultures harboring pXD70CT3 or pXD70CT5 in the presence of different concentrations of cumate overnight at 37 °C. Final OD<sub>600</sub> represented as mean  $\pm$  SD with n = 3 biological replicates. **c**, To identify an optimal site for CuO insertion on P<sub>csd</sub>, transcriptomic reads from previous *E. lenta* RNA-seq experiments<sup>1</sup> were mapped to the P<sub>csd</sub> region. A cumate operator was inserted near a site where we found an abrupt decrease of RNA read coverage, as we speculated that binding of CymR at this site may establish control of gene expression. **d**, Growth of *E. lenta* DSM 2243 cultures harboring pXD70LacZ6 in the presence of different concentrations of IPTG overnight at 37 °C. Final OD<sub>600</sub> represented as mean  $\pm$  SD with n = 3 biological replicates for **b** and **d**. Source data are provided as a Source Data file.

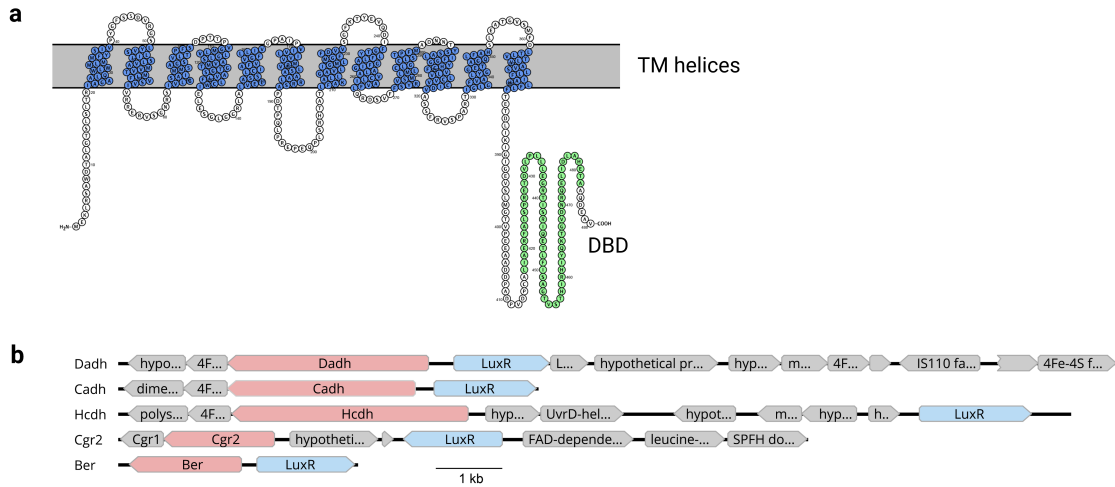

**Supplementary Fig. 3 | Domain architecture of DadR and genomic arrangement of 12-transmembrane helix LuxRs in *E. lenta* DSM 2243 genome. a**, DadR is predicted to possess an N-terminal 12-transmembrane helix domain (blue) and a C-terminal helix-turn-helix DNA-binding domain (green) by TMHMM<sup>2</sup>. Membrane topology model was generated by Protter<sup>3</sup>. **b**, Predicted 12-TM LuxRs (blue) are located near genes encoding *E. lenta* metabolic enzymes Dadh, Cadh, Hcdh, Cgr2, and Ber (red).

**a**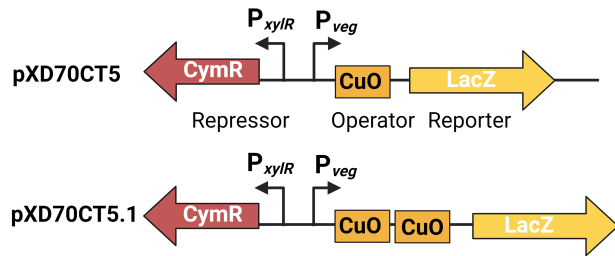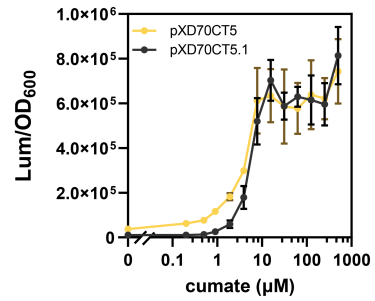**b**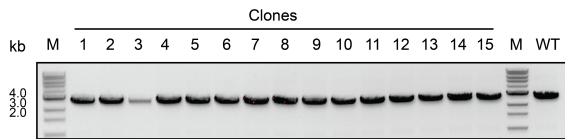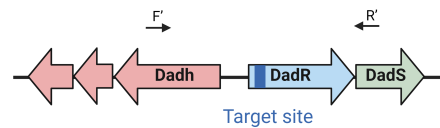**c**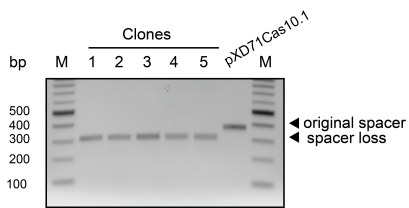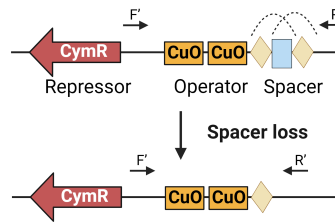**d**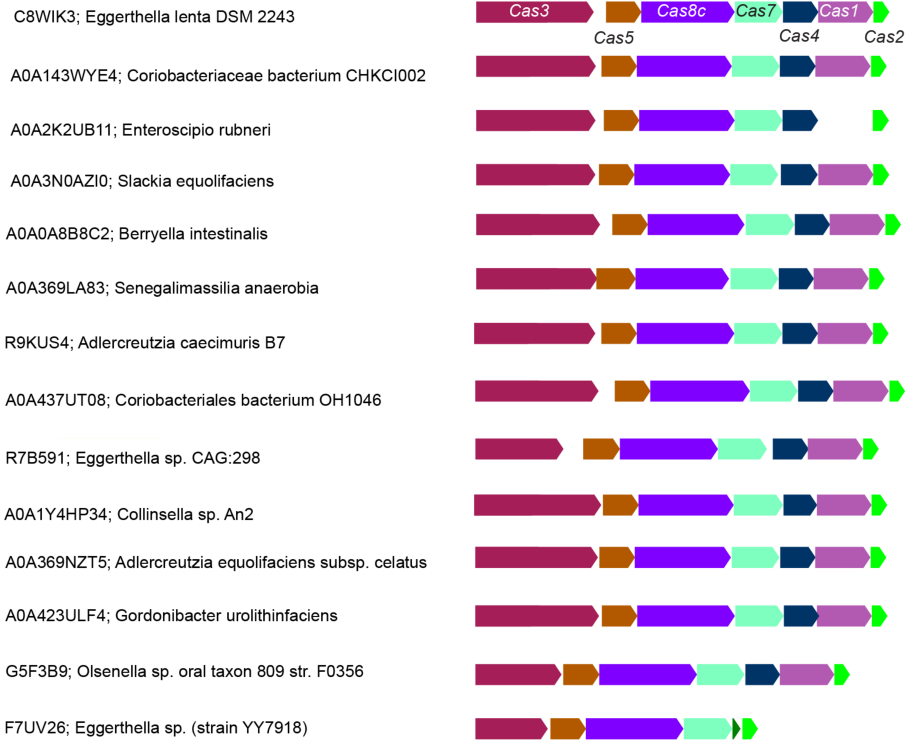

Scale: | 3 kbp

**Supplementary Fig. 4| Harnessing endogenous Type I-C CRISPR-Cas system for *E. lenta* genomic engineering, related to Fig. 5.** **a**, Adding an additional CuO tightened the expression control of cumate-inducible construct. *LacZ* assays revealed that pXD70CT5.1 construct showed lower *lacZ* expression levels than pXD70CT5 in the absence of cumate and at low cumate concentrations. Results represented as mean  $\pm$  SD with n = 3 biological replicates. **b**, PCR screening was performed to probe potential *dadR* deletion in colonies formed after spreading initial pXD71Cas10.1 transformant cultures onto a cumate-containing agar plate, and revealed all the tested colonies lacked *dadR* deletion. *E. lenta* DSM 2243 WT gDNA was used as control. Primers flanking the target site were used. **c**, PCR screening revealed spacer loss within colonies formed after spreading pXD71Cas10.1 transformant cultures onto a cumate-containing agar plate, which was confirmed by Sanger sequencing. pXD71Cas10.1 plasmid was used as control. **d**, Presence of Type I-C CRISPR-Cas systems in Coriobacteriia. The amino acid sequence of *E. lenta* DSM 2243 Cas3 (C8WIK3) was blast searched against Coriobacteriia genomes in UniProt database, and genomic contexts of the hits were retrieved and visualized using EFI-GNT tool<sup>4</sup> and manually curated according to the presence of other typical Cas proteins within genome neighborhoods. For each diagram, the accession of the Cas3 homolog, species identity and the CRISPR-Cas locus were displayed. Experiments shown in panels **b** and **c** were performed once on randomly selected colonies. Source data are provided as a Source Data file.

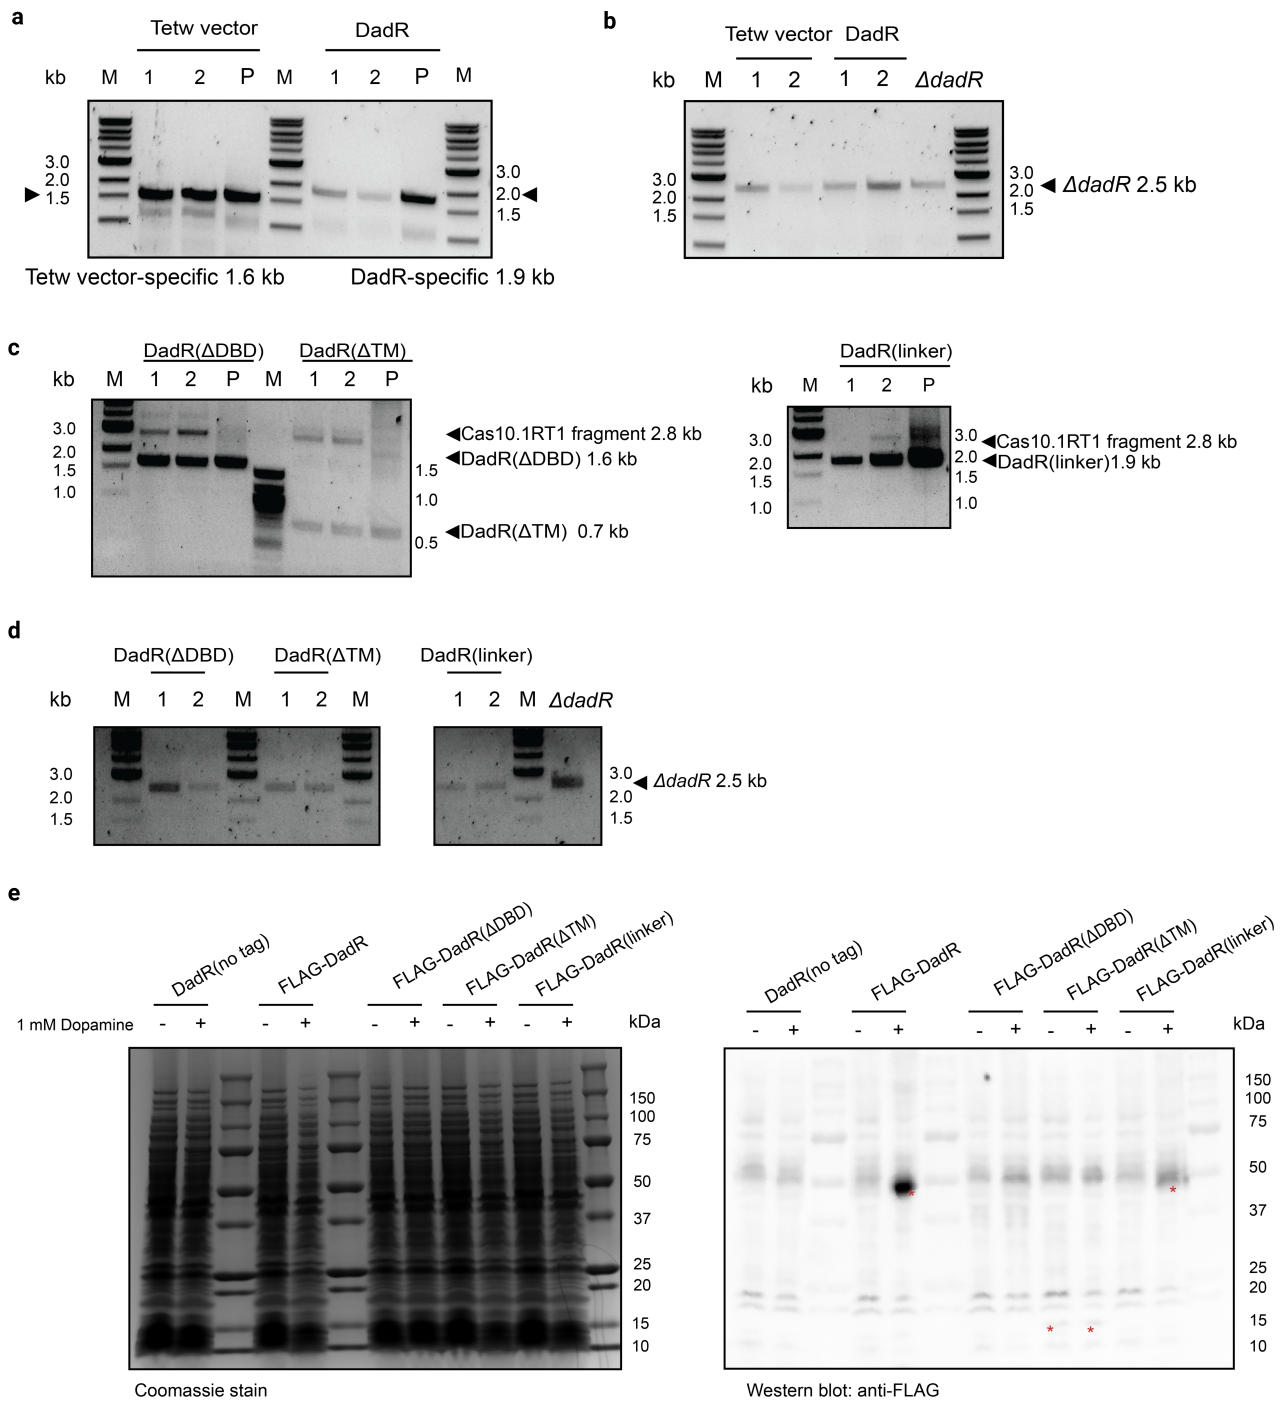

**Supplementary Fig. 5] Confirmation of *dadR* gene complementation and expression related to Fig. 6. a**, PCR screening confirmed the presence of tetracycline-resistance plasmid pXD69m1(TetW) vector and pXD70Tet(DadR) within the complemented strains  $\Delta dadR$ /vector and  $\Delta dadR$ /DadR, respectively. Plasmids (P) were used as controls. **b**, PCR screening confirmed the *dadR* deletion background of the  $\Delta dadR$ /vector and  $\Delta dadR$ /DadR strains. The gDNA of  $\Delta dadR$  strain was used as a control. **c**, PCR screening confirmed the presence of the plasmid encoding truncated DadR mutant DadR( $\Delta DBD$ ), DadR( $\Delta TM$ ) or linker shuffled mutant DadR(linker) within the corresponding

complemented strains. **d**, PCR screening confirmed the *dadR* deletion background of the strains complemented with plasmid encoding DadR mutants. **e**, Western blot to measure the expression of N-terminal FLAG-tagged DadR and DadR mutants. *E. lenta*  $\Delta$ *dadR* strains harboring various N-terminal FLAG-tagged DadR constructs were inoculated 1:20 in fresh BHIrf medium with 20  $\mu$ g/mL tetracycline and were either incubated with vehicle (-) or 1 mM dopamine (+) at 37 °C for 40 h before harvesting for measuring protein expression. Molecular weight of each of the N-FLAG-tagged constructs: FLAG-DadR 56 kDa, FLAG-DadR( $\Delta$ DBD) 48 kDa, FLAG-DadR( $\Delta$ TM) 15 kDa, FLAG-DadR(linker) 56 kDa. Asterisks indicate the detected signals for individual constructs. The unspecific signals close to the expected location of FLAG-DadR( $\Delta$ DBD) prevented a steady readout of signals from FLAG-DadR( $\Delta$ DBD). Experiments shown in panels **a–d** were performed once on randomly selected colonies. For the experiment shown in panel **e**, the Western blots for the DadR(no tag) and Flag-DadR samples were performed twice with similar results, and Western blots for the FLAG-DadR( $\Delta$ DBD), FLAG-DadR( $\Delta$ TM) and FLAG-DadR(linker) samples were performed once. Source data are provided as a Source Data file.

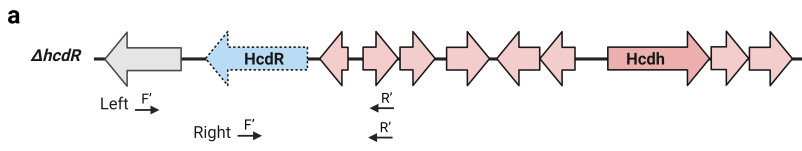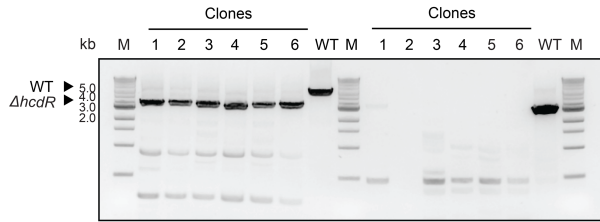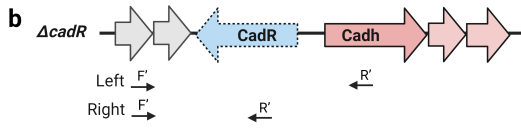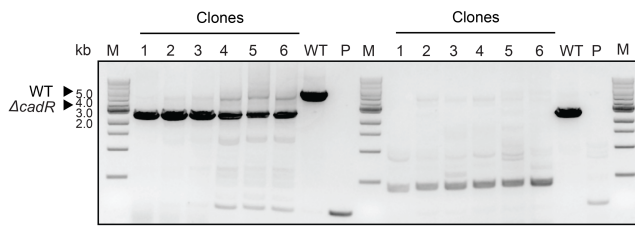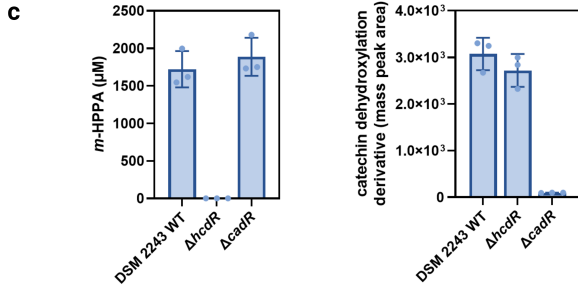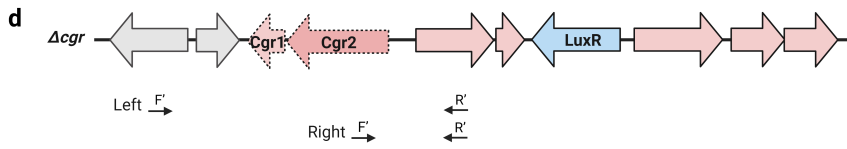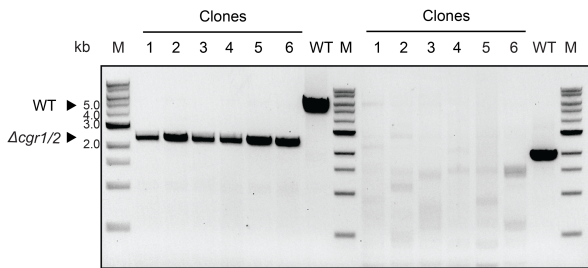



**Supplementary Fig. 6| Confirmation of additional gene deletion mutants. a,b,d**, PCR screening performed to probe deletion of *E. lenta* DSM 2243 *hcdR*, *cadR*, and *cgr1/cgr2*. *E. lenta* DSM 2243 WT gDNA was used as control template. For *cadR* deletion, crRNA plasmid (P) was also used as control template. Two sets of primers were used for confirming each gene deletion. Left: two primers are flanking the deletion region; Right: one primer was located within the deleted region and one primer was located outside of the deletion region. The lower faint bands may be PCR amplification artifacts. **c**, LC-MS/MS to quantify the production of hydrocaffeic acid dehydroxylation metabolite *m*-HPPA and (+)-catechin dehydroxylation product after incubation with corresponding *E. lenta* cultures for 48 h. Data represented as mean  $\pm$  SD with n = 3 biological replicates. Experiments shown in panels **a**, **b** and **d** were performed once on randomly selected colonies. Source data are provided as a Source Data file.



**a**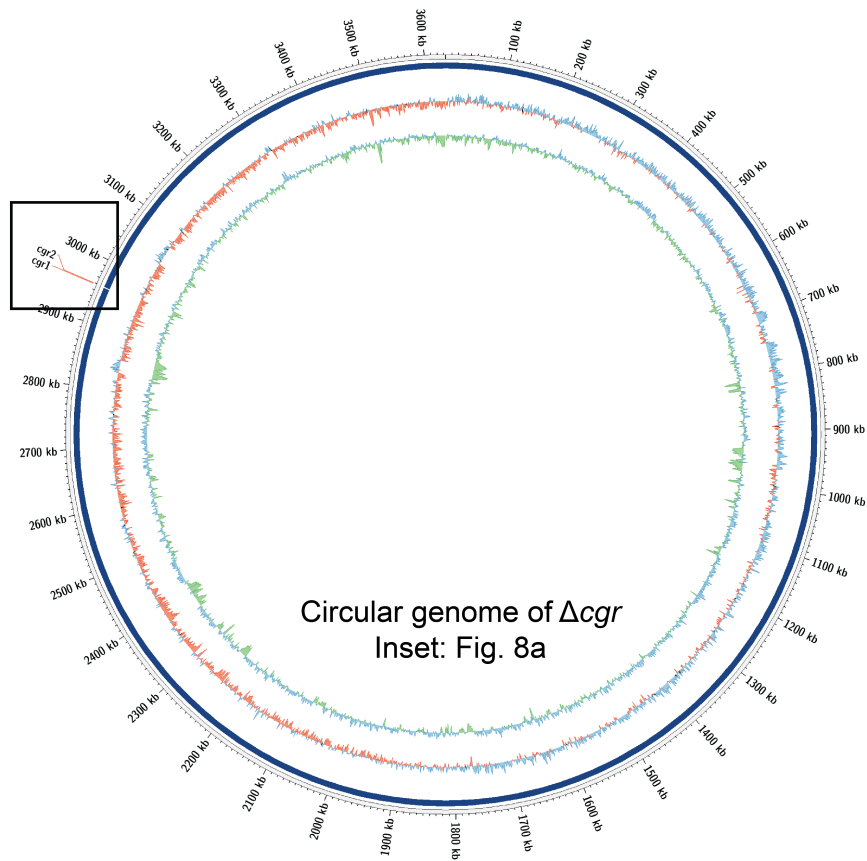**b**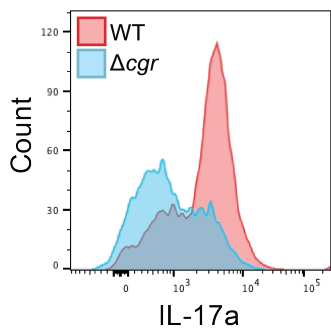**c**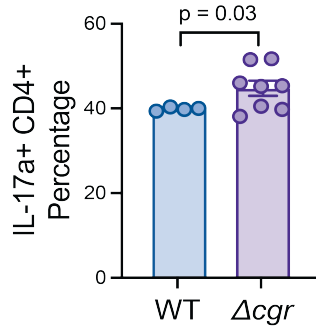**d**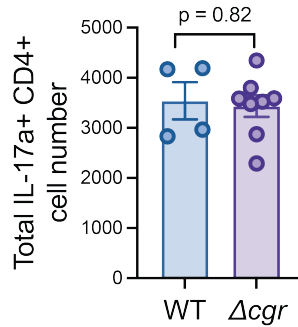**e**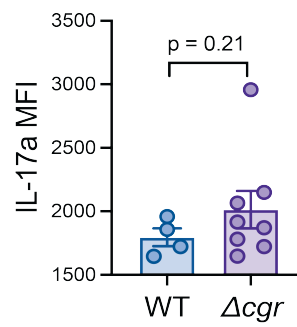**f**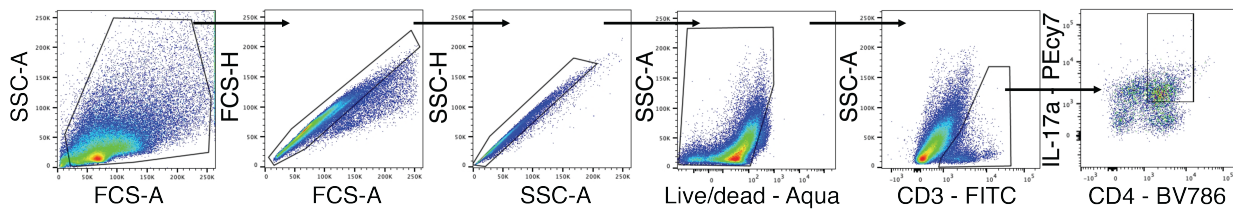

**Supplementary Fig. 8 | Experiments related to Figure 8.** **a**, Circos plot showing Flye assembly (blue) of the  $\Delta cgr$  genome aligned to the reference *E. lenta* DSM 2243 genome GCF\_000024265.1\_ASM2426v1 (figure generated with mummer2circos). **b–d**, Germ-free C57BL/6J male mice ages 6–8 weeks were separated into groups and gavaged with WT (n=4) and  $\Delta cgr$  (n=8) *E. lenta*. Bacteria were allowed to colonize for 2 weeks before the lamina propria was harvested. **b**, Representative fluorescence histograms of colonic IL-17a levels. **c**, Percentage of ileal IL-17a<sup>+</sup> CD4<sup>+</sup> cells within the live CD3<sup>+</sup> gate. **d**, Total numbers of ileal IL-17a<sup>+</sup> CD4<sup>+</sup> cells within the live CD3<sup>+</sup> gate. **e**, Mean fluorescence intensity of ileal IL-17a. **f**, Gating strategy for flow cytometry of Th17 cells. All *p*-values are displayed and were calculated with one-way ANOVA tests with Tukey's multiple correction or Welch's *t* tests for two-way comparisons. Data represented as mean  $\pm$  SD for **c**, **d**, and **e**. Panels **b–e** show representative data from the first of two independent experiments. Source data are provided as a Source Data file.

**Supplementary Table 1| Whole genome sequencing for the  $\Delta cgr$  strain in comparison with other reported genomes of *E. lenta* DSM 2243.**

Gene annotations are based on NCBI/Prodigal for the reference genome, and prokka v1.13.3 for DSM 2243 (UCSF) and  $\Delta cgr$ .

| Genome name                    | <i>Eggerthella lenta</i><br>DSM 2243                                                            | <i>Eggerthella lenta</i><br>DSM 2243 (UCSF) | <i>Eggerthella lenta</i><br>DSM 2243 $\Delta cgr$ |
|--------------------------------|-------------------------------------------------------------------------------------------------|---------------------------------------------|---------------------------------------------------|
| Source/reporting study         | NCBI RefSeq<br><a href="https://.ncbi.nlm.nih.gov/assembly/GCF_000024265.1">GCF_000024265.1</a> | (Bisanz et al. 2020) <sup>5</sup>           | This study                                        |
| Genome size (bp)               | 3632260                                                                                         | 3596824                                     | 3641600                                           |
| Number of contigs              | 1                                                                                               | 69                                          | 1                                                 |
| N50                            | 3632260                                                                                         | 130831                                      | 3641600                                           |
| Coverage                       | 10.2x Sanger; 25.3x pyrosequence                                                                | 1210.4x Illumina                            | 107.1x Oxford Nanopore Minlon                     |
| Number of protein-coding genes | 3062                                                                                            | 3091                                        | 3151                                              |
| Number of tRNA genes           | 49                                                                                              | 52                                          | 52                                                |
| Number of rRNA genes           | 9                                                                                               | 3                                           | 9                                                 |
| GC content                     | 64.20%                                                                                          | 64.19%                                      | 64.19%                                            |
| Completeness                   | 100%                                                                                            | 100%                                        | 98.80%                                            |
| Contamination                  | 0%                                                                                              | 0%                                          | 0%                                                |
| SNPs vs DSM 2243 reference     | N/A                                                                                             | 24                                          | 120                                               |
| Indels vs DSM 2243 reference   | N/A                                                                                             | 17                                          | 106                                               |

## Supplementary References

- 1 Rekdal, V. M., Bess, E. N., Bisanz, J. E., Turnbaugh, P. J. & Balskus, E. P. Discovery and inhibition of an interspecies gut bacterial pathway for Levodopa metabolism. *Science* **364**, eaau6323 (2019).
- 2 Krogh, A., Larsson, B., von Heijne, G. & Sonnhammer, E. L. Predicting transmembrane protein topology with a hidden Markov model: application to complete genomes. *J. Mol. Biol.* **305**, 567-580 (2001).
- 3 Omasits, U., Ahrens, C. H., Muller, S. & Wollscheid, B. Protter: interactive protein feature visualization and integration with experimental proteomic data. *Bioinformatics* **30**, 884-886 (2014).
- 4 Zallot, R., Oberg, N. & Gerlt, J. A. The EFI Web Resource for Genomic Enzymology Tools: Leveraging Protein, Genome, and Metagenome Databases to Discover Novel Enzymes and Metabolic Pathways. *Biochemistry* **58**, 4169-4182 (2019).
- 5 Bisanz, J. E. *et al.* A Genomic Toolkit for the Mechanistic Dissection of Intractable Human Gut Bacteria. *Cell Host Microbe* **27**, 1001-1013 e1009 (2020).
